# Supplementary material
Source: publisher site journal article supplement (https://www.dovepress.com/article/458580)
Supplement: Supplementary file 1 [file get_supplementary_file.php]

**Supplementary Table 1 Reagents and instruments**

| <b>Reagents / instruments</b>            | <b>Product Code</b> | <b>Manufacturer</b>                            |
|------------------------------------------|---------------------|------------------------------------------------|
| LPS                                      | L2880               | Sigma, St. Louis, USA                          |
| isoflurane                               | R510-22-10          | RWD Life Science Co., Ltd., Shenzhen,<br>China |
| pentobarbital sodium                     | P3761               | Sigma, St. Louis, USA                          |
| Acupuncture needles                      | 0.25mm×15mm         | Suzhou Medical Supplies Co. Ltd,<br>China      |
| EA apparatus                             | HuaTuo SDZ-V type   | Suzhou Medical Supplies Co. Ltd,<br>China      |
| Xylene                                   | -                   | Chengdu Kolon Chemical Co., Ltd,<br>China      |
| HE Staining Kit                          | DH0020              | Leagene, China                                 |
| (HRP-labeled) secondary<br>antibodies    | BL003A              | Biosharp, China                                |
| RIPA lysis buffer                        | G2002-100mL         | Servicebio, Wuhan, China                       |
| phenylmethylsulfonyl<br>fluoride (100mM) | CR2202124           | Servicebio, Wuhan, China                       |
| Phosphatase Inhibitor                    | CR2202004-1         | Servicebio, Wuhan, China                       |
| BCA Protein Concentration<br>Assay Kit   | BL521A              | Servicebio, Wuhan, China                       |
| SDS-PAGE Gel                             | CR2203049           | Servicebio, Wuhan, China                       |

Preparation Kit

PVDF Membrane, 0.45µm      RISB97908      Immobilon-P, Germany

HRP-Goat anti Rabbit      JAC-111-035-003      JacKson, America

HRP-Goat anti Mouse      JAC-115-035-003      JacKson, America

Ultra-sensitive ECL      CR2108094      Servicebio, Wuhan, China

Chemiluminescent

Substrate

Embedding Machine      JB-P5      Wuhan Junjie Electronic Co., Ltd,  
China

Tissue Rapid Dehydrator      STP420 ES      Thermo Scientific/Thermo Fisher  
Scientific, America

Slicer      HM325      Thermo Scientific/Thermo Fisher  
Scientific, America

Automatic Staining      Varistain™ Gemini ES      Thermo Scientific/Thermo Fisher  
Machine      Scientific, America

digital panoramic scanner      PANNORAMIC      3D-HISTECH, Hungary  
DESK/MIDI/250/1000

microscope      DM500      Leica, Germany

Agilent 2100 Bioanalyzer      G2939A      Agilent Technologies, Palo Alto, CA

---

**Supplementary Table 2 Primer information**

| Primer name | The sequence(5' to 3')  |
|-------------|-------------------------|
| ACTIN F     | TCAGGTCATCACTATCGGCAAT  |
| ACTIN R     | AAAGAAAGGGTGTAAAACGCA   |
| Mrc1 F      | CAAGGAAGGTTGGCATTGT     |
| Mrc1 R      | GGAACGTGTGCTCTGAGTT     |
| Gpnmb F     | CCAGGTAGCAGATGTCCCAA    |
| Gpnmb R     | TTGCAGGTCACAATGAAGTCC   |
| Aqp9 F      | GATGGACTCATGGCCTTTGCTG  |
| Aqp9 R      | CAATCATAGGACCCACGACAGG  |
| Trem1 F     | AAGTATGCCAGAAGCAGGAAGG  |
| Trem1 R     | GGTAGGGTCATCTTTCAGGGTGT |
| Pde3a F     | TCACAGGGCCTTAACTTACAC3  |
| Pde3a R     | GGAGCAAGAATTGGTTTGTC    |
| Bmp6 F      | GACAGCAGAGTCGCAATCG     |
| Bmp6 R      | AGCTCACGTAAAGCTCATGC    |
| Slc26a4 F   | GTGGGGTCCGTTGTTC        |
| Slc26a4 R   | CCGTTGTAGTTTTTGGTTGAG   |
| Msr1 F      | TGTGGGCCAGATGCTGAAAT    |
| Msr1 R      | AGGGATGCTGTCATGGAACG    |

**Supplementary Table 3 The list of 27 genes downregulated in the COPD vs. NC group, and inversely upregulated after EA treatment.**

| Gene ID            | Gene name | Description                                                                                       | 1mA vs | log2FC | P value  | 3mA vs | log2FC | P value  | COPD vs | log2FC | P value  |
|--------------------|-----------|---------------------------------------------------------------------------------------------------|--------|--------|----------|--------|--------|----------|---------|--------|----------|
|                    |           |                                                                                                   | COPD   |        |          | COPD   |        |          | Normal  |        |          |
| ENSRNOG00000018268 | Hhip      | Hedgehog-interacting protein                                                                      | UP     | 1.23   | 3.34E-05 | UP     | 1.50   | 4.61E-07 | DOWN    | -2.55  | 1.01E-16 |
| ENSRNOG00000019120 | Hmgcs2    | 3-hydroxy-3-methylglutaryl-CoA synthase 2                                                         | UP     | 1.06   | 3.19E-04 | UP     | 1.37   | 3.69E-06 | DOWN    | -1.39  | 2.62E-06 |
| ENSRNOG00000069899 | -         | -                                                                                                 | UP     | 3.69   | 2.20E-26 | UP     | 3.79   | 8.84E-28 | DOWN    | -4.40  | 9.71E-36 |
| ENSRNOG00000011901 | Rrad      | RRAD, Ras related glycolysis inhibitor and calcium channel regulator                              | UP     | 1.08   | 2.93E-04 | UP     | 1.43   | 1.93E-06 | DOWN    | -1.48  | 7.70E-07 |
| ENSRNOG00000028624 | Kif26b    | kinesin family member 26B                                                                         | UP     | 1.15   | 1.08E-04 | UP     | 1.21   | 4.59E-05 | DOWN    | -1.15  | 1.08E-04 |
| ENSRNOG00000039571 | Glod5     | glyoxalase domain containing 5                                                                    | UP     | 1.04   | 7.51E-04 | UP     | 1.16   | 1.39E-04 | DOWN    | -1.43  | 3.07E-06 |
| ENSRNOG00000020424 | Plpp4     | phospholipid phosphatase 4                                                                        | UP     | 1.55   | 9.17E-07 | UP     | 2.08   | 4.10E-11 | DOWN    | -2.64  | 1.10E-16 |
| ENSRNOG00000015473 | Phactr2   | phosphatase and actin regulator 2                                                                 | UP     | 1.07   | 2.68E-04 | UP     | 1.06   | 3.08E-04 | DOWN    | -1.30  | 9.70E-06 |
| ENSRNOG00000014030 | Sym       | synemin                                                                                           | UP     | 1.09   | 1.98E-04 | UP     | 1.00   | 6.14E-04 | DOWN    | -1.50  | 4.12E-07 |
| ENSRNOG00000005700 | Nsg1      | neuronal vesicle trafficking associated 1                                                         | UP     | 1.04   | 4.03E-04 | UP     | 1.17   | 7.46E-05 | DOWN    | -1.62  | 5.07E-08 |
| ENSRNOG00000010280 | Pde8b     | phosphodiesterase 8B                                                                              | UP     | 1.18   | 8.26E-05 | UP     | 1.72   | 1.22E-08 | DOWN    | -1.65  | 4.49E-08 |
| ENSRNOG00000067538 | -         | -                                                                                                 | UP     | 1.13   | 1.68E-04 | UP     | 1.05   | 4.16E-04 | DOWN    | -1.41  | 2.38E-06 |
| ENSRNOG00000010447 | Tmod2     | tropomodulin 2                                                                                    | UP     | 1.57   | 6.00E-07 | UP     | 1.43   | 5.70E-06 | DOWN    | -1.72  | 4.56E-08 |
| ENSRNOG00000018557 | Cdh22     | cadherin 22                                                                                       | UP     | 1.22   | 6.14E-05 | UP     | 1.57   | 2.86E-07 | DOWN    | -1.35  | 8.61E-06 |
| ENSRNOG00000003762 | Smarca1   | SWI/SNF related, matrix associated, actin dependent regulator of chromatin, subfamily a, member 1 | UP     | 1.34   | 7.44E-06 | UP     | 1.22   | 4.18E-05 | DOWN    | -1.61  | 7.21E-08 |
| ENSRNOG00000001652 | Erg       | ETS transcription factor ERG                                                                      | UP     | 1.11   | 1.59E-04 | UP     | 1.16   | 8.10E-05 | DOWN    | -1.60  | 6.90E-08 |
| ENSRNOG00000054013 | Clec4g    | C-type lectin domain family 4, member G                                                           | UP     | 2.12   | 9.46E-12 | UP     | 1.91   | 6.04E-10 | DOWN    | -2.56  | 3.64E-16 |
| ENSRNOG00000003209 | Pcp4l1    | Purkinje cell protein 4-like 1                                                                    | UP     | 1.28   | 2.03E-05 | UP     | 1.18   | 7.91E-05 | DOWN    | -1.62  | 6.93E-08 |
| ENSRNOG00000063400 | Shisa9    | shisa family member 9                                                                             | UP     | 1.14   | 1.58E-04 | UP     | 1.42   | 2.81E-06 | DOWN    | -1.51  | 5.54E-07 |
| ENSRNOG00000019549 | Akap12    | A-kinase anchoring protein 12                                                                     | UP     | 1.07   | 2.73E-04 | UP     | 1.66   | 2.25E-08 | DOWN    | -1.68  | 1.70E-08 |
| ENSRNOG00000031211 | Acsm5     | acyl-CoA synthetase medium-chain family member 5                                                  | UP     | 1.24   | 2.71E-05 | UP     | 1.31   | 8.95E-06 | DOWN    | -2.02  | 1.94E-11 |
| ENSRNOG00000019365 | Ablim3    | actin binding LIM protein family, member 3                                                        | UP     | 1.69   | 1.27E-08 | UP     | 1.37   | 3.20E-06 | DOWN    | -1.53  | 2.46E-07 |
| ENSRNOG00000028743 | Gal3st3   | galactose-3-O-sulfotransferase 3                                                                  | UP     | 1.09   | 2.37E-04 | UP     | 1.95   | 9.50E-11 | DOWN    | -1.56  | 1.76E-07 |
| ENSRNOG00000007370 | Rnf144a   | ring finger protein 144A                                                                          | UP     | 1.07   | 3.71E-04 | UP     | 1.79   | 3.41E-09 | DOWN    | -1.61  | 1.01E-07 |
| ENSRNOG00000013408 | Npas2     | neuronal PAS domain protein 2                                                                     | UP     | 1.45   | 1.07E-06 | UP     | 1.82   | 1.21E-09 | DOWN    | -2.97  | 1.85E-21 |
| ENSRNOG00000063594 | -         | -                                                                                                 | UP     | 1.05   | 4.48E-04 | UP     | 1.20   | 6.63E-05 | DOWN    | -1.52  | 4.46E-07 |
| ENSRNOG00000058202 | Ppp2r2c   | protein phosphatase 2, regulatory subunit B, gamma                                                | UP     | 1.24   | 4.36E-05 | UP     | 1.35   | 8.70E-06 | DOWN    | -1.79  | 4.52E-09 |

**Supplementary Table 4 The list of 63 genes upregulated in the COPD vs. NC group, and inversely downregulated after EA treatment.**

| Gene ID            | Gene name      | Description                                                 | 1mA vs | log2FC | P value  | 3mA vs | log2FC | P value  | COPD vs | log2FC | P value  |
|--------------------|----------------|-------------------------------------------------------------|--------|--------|----------|--------|--------|----------|---------|--------|----------|
|                    |                |                                                             | COPD   |        |          | COPD   |        |          | Normal  |        |          |
| ENSRNOG00000058337 | Plcb2          | phospholipase C, beta 2                                     | DOWN   | -1.18  | 5.93E-05 | DOWN   | -1.04  | 3.92E-04 | UP      | 1.41   | 1.72E-06 |
| ENSRNOG00000054964 | Aoah           | acyloxyacyl hydrolase                                       | DOWN   | -1.67  | 2.10E-08 | DOWN   | -1.27  | 1.54E-05 | UP      | 1.54   | 2.01E-07 |
| ENSRNOG00000021310 | Slc36a3        | solute carrier family 36, member 3                          | DOWN   | -1.48  | 5.35E-06 | DOWN   | -1.64  | 2.81E-07 | UP      | 2.31   | 2.07E-11 |
| ENSRNOG00000013747 | Sh3bp2         | SH3-domain binding protein 2                                | DOWN   | -1.33  | 6.07E-06 | DOWN   | -1.03  | 4.38E-04 | UP      | 1.18   | 5.94E-05 |
| ENSRNOG00000024115 | C6             | complement C6                                               | DOWN   | -2.25  | 1.19E-13 | DOWN   | -1.81  | 1.40E-09 | UP      | 4.02   | 1.56E-34 |
| ENSRNOG00000024346 | Plet1          | placenta expressed transcript 1                             | DOWN   | -1.15  | 8.39E-05 | DOWN   | -1.04  | 3.74E-04 | UP      | 1.92   | 1.44E-10 |
| ENSRNOG00000004226 | Irak3          | interleukin-1 receptor-associated kinase 3                  | DOWN   | -1.05  | 3.52E-04 | DOWN   | -1.07  | 2.69E-04 | UP      | 1.26   | 1.89E-05 |
| ENSRNOG00000022975 | Nfam1          | NFAT activating protein with ITAM motif 1                   | DOWN   | -1.21  | 3.71E-05 | DOWN   | -1.05  | 3.25E-04 | UP      | 1.45   | 9.13E-07 |
| ENSRNOG00000002385 | Prg4           | proteoglycan 4                                              | DOWN   | -1.55  | 1.54E-07 | DOWN   | -1.04  | 3.92E-04 | UP      | 1.48   | 5.22E-07 |
| ENSRNOG00000020136 | Tgm1           | transglutaminase 1                                          | DOWN   | -1.62  | 5.50E-08 | DOWN   | -1.26  | 1.87E-05 | UP      | 1.27   | 1.63E-05 |
| ENSRNOG00000026203 | Pax8           | paired box 8                                                | DOWN   | -1.33  | 1.02E-05 | DOWN   | -1.19  | 7.32E-05 | UP      | 1.69   | 2.78E-08 |
| ENSRNOG00000018251 | Mrc1           | mannose receptor, C type 1                                  | DOWN   | -1.75  | 4.51E-09 | DOWN   | -1.32  | 7.39E-06 | UP      | 1.55   | 1.54E-07 |
| ENSRNOG00000016826 | Pla2g2d        | phospholipase A2, group IID                                 | DOWN   | -1.50  | 3.98E-07 | DOWN   | -1.06  | 2.90E-04 | UP      | 1.37   | 3.36E-06 |
| ENSRNOG00000020716 | Axl            | Axl receptor tyrosine kinase                                | DOWN   | -1.40  | 2.02E-06 | DOWN   | -1.00  | 6.06E-04 | UP      | 1.31   | 7.99E-06 |
| ENSRNOG00000011107 | Pcsk1          | proprotein convertase subtilisin/kexin type 1               | DOWN   | -1.42  | 1.53E-06 | DOWN   | -1.38  | 3.05E-06 | UP      | 2.06   | 8.03E-12 |
| ENSRNOG00000067740 | -              | -                                                           | DOWN   | -1.78  | 2.75E-09 | DOWN   | -1.59  | 9.01E-08 | UP      | 2.47   | 7.08E-16 |
| ENSRNOG00000029179 | Cyp2d3         | cytochrome P450, family 2, subfamily d, polypeptide 3       | DOWN   | -1.33  | 9.52E-06 | DOWN   | -1.04  | 4.89E-04 | UP      | 1.50   | 5.73E-07 |
| ENSRNOG00000013641 | Myo7a          | myosin VIIA                                                 | DOWN   | -1.56  | 1.67E-07 | DOWN   | -1.07  | 3.03E-04 | UP      | 2.12   | 4.39E-12 |
| ENSRNOG00000053430 | Slco4a1        | solute carrier organic anion transporter family, member 4a1 | DOWN   | -1.96  | 1.58E-10 | DOWN   | -1.51  | 5.66E-07 | UP      | 1.61   | 9.77E-08 |
| ENSRNOG00000034190 | Ighm           | immunoglobulin heavy constant epsilon                       | DOWN   | -1.51  | 3.31E-07 | DOWN   | -1.32  | 7.04E-06 | UP      | 2.82   | 7.63E-20 |
| ENSRNOG00000065128 | Naip5          | NLR family, apoptosis inhibitory protein 5                  | DOWN   | -1.27  | 1.92E-05 | DOWN   | -1.55  | 1.88E-07 | UP      | 1.89   | 3.36E-10 |
| ENSRNOG00000026306 | Clec5a         | C-type lectin domain containing 5A                          | DOWN   | -1.45  | 1.11E-06 | DOWN   | -1.20  | 4.70E-05 | UP      | 1.87   | 5.60E-10 |
| ENSRNOG00000071194 | -              | -                                                           | DOWN   | -1.25  | 2.58E-05 | DOWN   | -1.13  | 1.40E-04 | UP      | 1.25   | 2.87E-05 |
| ENSRNOG00000003170 | Nlrp3          | NLR family, pyrin domain containing 3                       | DOWN   | -1.22  | 3.80E-05 | DOWN   | -1.18  | 6.24E-05 | UP      | 1.38   | 3.51E-06 |
| ENSRNOG00000042237 | Tm6sf2         | transmembrane 6 superfamily member 2                        | DOWN   | -1.21  | 5.39E-05 | DOWN   | -1.15  | 1.14E-04 | UP      | 1.31   | 1.14E-05 |
| ENSRNOG00000010935 | Cpb2           | carboxypeptidase B2                                         | DOWN   | -1.16  | 1.36E-04 | DOWN   | -1.50  | 1.60E-06 | UP      | 3.50   | 7.67E-24 |
| ENSRNOG00000037331 | Cd33           | CD33 molecule                                               | DOWN   | -1.61  | 6.03E-08 | DOWN   | -1.35  | 4.55E-06 | UP      | 1.94   | 1.18E-10 |
| ENSRNOG00000034038 | AABR07005844.1 | deleted in malignant brain tumors 1 protein-like            | DOWN   | -1.65  | 3.54E-08 | DOWN   | -1.27  | 1.92E-05 | UP      | 2.09   | 4.91E-12 |
| ENSRNOG00000030877 | Htr2c          | 5-hydroxytryptamine receptor 2C                             | DOWN   | -1.49  | 7.96E-07 | DOWN   | -1.09  | 2.67E-04 | UP      | 1.20   | 7.19E-05 |
| ENSRNOG00000061883 | Aqp9           | aquaporin 9                                                 | DOWN   | -1.14  | 1.71E-04 | DOWN   | -1.28  | 2.93E-05 | UP      | 1.67   | 9.71E-08 |
| ENSRNOG00000026235 | Hk3            | hexokinase 3                                                | DOWN   | -1.59  | 8.65E-08 | DOWN   | -1.33  | 6.35E-06 | UP      | 2.61   | 1.95E-17 |
| ENSRNOG00000018790 | Kcnh4          | potassium voltage-gated channel subfamily H member 4        | DOWN   | -1.44  | 1.17E-06 | DOWN   | -1.20  | 4.90E-05 | UP      | 1.98   | 6.99E-11 |
| ENSRNOG00000037563 | Cd68           | Cd68 molecule                                               | DOWN   | -1.44  | 1.12E-06 | DOWN   | -1.23  | 3.01E-05 | UP      | 2.09   | 4.29E-12 |
| ENSRNOG00000005246 | Tfap2c         | transcription factor AP-2 gamma                             | DOWN   | -1.09  | 2.16E-03 | DOWN   | -1.05  | 2.01E-03 | UP      | 1.18   | 6.53E-04 |
| ENSRNOG00000027739 | Cndp1          | carnosine dipeptidase 1                                     | DOWN   | -1.37  | 3.23E-06 | DOWN   | -1.10  | 1.84E-04 | UP      | 1.51   | 3.39E-07 |

|                    |          |                                                    |      |       |          |      |       |          |    |      |          |
|--------------------|----------|----------------------------------------------------|------|-------|----------|------|-------|----------|----|------|----------|
| ENSRNOG00000004704 | Dstamp   | dendrocyte expressed seven transmembrane protein   | DOWN | -1.71 | 1.03E-08 | DOWN | -1.35 | 5.30E-06 | UP | 1.59 | 9.41E-08 |
| ENSRNOG00000039390 | Slc37a2  | solute carrier family 37 member 2                  | DOWN | -1.17 | 7.41E-05 | DOWN | -1.05 | 3.61E-04 | UP | 1.67 | 2.37E-08 |
| ENSRNOG00000008588 | Batf     | basic leucine zipper ATF-like transcription factor | DOWN | -1.12 | 1.68E-04 | DOWN | -1.13 | 1.53E-04 | UP | 1.81 | 2.63E-09 |
| ENSRNOG00000057827 | Lmln2    | leishmanolysin like peptidase 2                    | DOWN | -1.35 | 1.59E-05 | DOWN | -1.36 | 1.43E-05 | UP | 1.33 | 2.90E-05 |
| ENSRNOG00000070924 | -        | -                                                  | DOWN | -1.14 | 2.74E-04 | DOWN | -1.19 | 1.27E-04 | UP | 1.36 | 1.67E-05 |
| ENSRNOG00000028016 | Ncf2     | neutrophil cytosolic factor 2                      | DOWN | -1.37 | 3.28E-06 | DOWN | -1.10 | 1.87E-04 | UP | 1.50 | 4.50E-07 |
| ENSRNOG00000036726 | Cd300e   | Cd300e molecule                                    | DOWN | -1.70 | 1.74E-08 | DOWN | -1.70 | 1.73E-08 | UP | 1.83 | 2.27E-09 |
| ENSRNOG00000018748 | Slc16a11 | solute carrier family 16, member 11                | DOWN | -2.34 | 2.76E-14 | DOWN | -1.68 | 2.29E-08 | UP | 3.07 | 2.29E-22 |
| ENSRNOG00000017521 | Gpr55    | G protein-coupled receptor 55                      | DOWN | -1.61 | 2.75E-07 | DOWN | -1.81 | 6.70E-09 | UP | 1.87 | 2.16E-09 |
| ENSRNOG00000050672 | Ervfrd-1 | endogenous retrovirus group FRD member 1, envelope | DOWN | -1.64 | 9.82E-07 | DOWN | -1.27 | 8.20E-05 | UP | 1.65 | 5.61E-07 |
| ENSRNOG00000004150 | Slc9a7   | solute carrier family 9 member A7                  | DOWN | -1.33 | 1.22E-05 | DOWN | -1.14 | 1.67E-04 | UP | 1.60 | 2.04E-07 |
| ENSRNOG00000014653 | Arl11    | ADP-ribosylation factor like GTPase 11             | DOWN | -1.30 | 9.96E-06 | DOWN | -1.03 | 4.19E-04 | UP | 1.72 | 8.64E-09 |
| ENSRNOG00000022859 | Trem1    | triggering receptor expressed on myeloid cells 1   | DOWN | -1.65 | 2.90E-08 | DOWN | -1.45 | 1.10E-06 | UP | 1.98 | 5.93E-11 |
| ENSRNOG00000017381 | Itih4    | inter-alpha-trypsin inhibitor heavy chain 4        | DOWN | -1.56 | 2.34E-07 | DOWN | -1.26 | 2.05E-05 | UP | 1.38 | 3.55E-06 |
| ENSRNOG00000047367 | Card14   | caspase recruitment domain family, member 14       | DOWN | -1.63 | 4.39E-08 | DOWN | -1.07 | 2.56E-04 | UP | 2.16 | 9.51E-13 |
| ENSRNOG00000066785 | -        | -                                                  | DOWN | -1.31 | 8.76E-06 | DOWN | -1.23 | 3.07E-05 | UP | 1.93 | 1.31E-10 |
| ENSRNOG00000015774 | Mreg     | melanoregulin                                      | DOWN | -1.00 | 6.23E-04 | DOWN | -1.10 | 2.02E-04 | UP | 2.75 | 1.73E-18 |
| ENSRNOG00000033064 | Edil3    | EGF like repeats and discoidin domains 3           | DOWN | -1.13 | 1.13E-04 | DOWN | -1.16 | 7.82E-05 | UP | 1.52 | 3.37E-07 |
| ENSRNOG00000064228 | -        | -                                                  | DOWN | -1.11 | 1.51E-04 | DOWN | -1.16 | 8.64E-05 | UP | 1.26 | 2.20E-05 |
| ENSRNOG00000000815 | Smpd3a   | sphingomyelin phosphodiesterase, acid-like 3A      | DOWN | -1.44 | 1.13E-06 | DOWN | -1.35 | 4.33E-06 | UP | 2.17 | 6.95E-13 |
| ENSRNOG00000013748 | Trem3    | triggering receptor expressed on myeloid cells 3   | DOWN | -1.10 | 1.86E-04 | DOWN | -1.48 | 6.69E-07 | UP | 1.30 | 1.23E-05 |
| ENSRNOG00000036692 | Gcgr     | glucagon receptor                                  | DOWN | -1.11 | 2.30E-04 | DOWN | -1.09 | 3.14E-04 | UP | 2.84 | 3.18E-18 |
| ENSRNOG00000014956 | Slc11a1  | solute carrier family 11 member 1                  | DOWN | -1.25 | 2.20E-05 | DOWN | -1.04 | 3.69E-04 | UP | 1.96 | 6.02E-11 |
| ENSRNOG00000008816 | Gpnmb    | glycoprotein nmb                                   | DOWN | -1.33 | 5.74E-06 | DOWN | -1.18 | 5.50E-05 | UP | 2.33 | 1.79E-14 |
| ENSRNOG00000008839 | Pparg    | peroxisome proliferator-activated receptor gamma   | DOWN | -1.35 | 4.79E-06 | DOWN | -1.02 | 4.69E-04 | UP | 1.28 | 1.42E-05 |
| ENSRNOG00000021243 | Siglec1  | sialic acid binding Ig like lectin 1               | DOWN | -1.77 | 2.87E-09 | DOWN | -1.54 | 2.03E-07 | UP | 2.23 | 1.95E-13 |
| ENSRNOG00000000187 | Csf2rb   | colony stimulating factor 2 receptor subunit beta  | DOWN | -1.61 | 6.35E-08 | DOWN | -1.26 | 2.00E-05 | UP | 2.13 | 2.10E-12 |
| ENSRNOG00000023214 | Il20rb   | interleukin 20 receptor subunit beta               | DOWN | -1.15 | 8.47E-05 | DOWN | -1.03 | 4.83E-04 | UP | 1.08 | 2.50E-04 |

**Supplementary Table 5 The respective GO functional analyzes by pairwise group comparisons**

| COPD vs NC       |                                  |       |      |          |             |                                                                                                                                                                                                       |            |          |           |                 |            |           |          |
|------------------|----------------------------------|-------|------|----------|-------------|-------------------------------------------------------------------------------------------------------------------------------------------------------------------------------------------------------|------------|----------|-----------|-----------------|------------|-----------|----------|
| Category         | Term                             | Count | %    | P Value  | Log P value | Genes                                                                                                                                                                                                 | List Total | Pop Hits | Pop Total | Fold Enrichment | Bonferroni | Benjamini | FDR      |
| GOTERM_BP_DIRECT | GO:0006954 inflammatory response | 39    | 4.29 | 2.40E-08 | -7.62       | ENSRNOG00000031930, ENSRNOG00000070382, ENSRNOG00000019077, ENSRNOG00000046834, ENSRNOG00000065935, ENSRNOG00000017819,                                                                               | 778        | 346      | 19234     | 2.79            | 9.82E-05   | 6.30E-05  | 6.23E-05 |
|                  |                                  |       |      |          |             | ENSRNOG00000009848, ENSRNOG00000028548, ENSRNOG0000007989, ENSRNOG00000020716, ENSRNOG00000033693, ENSRNOG00000016945, ENSRNOG0000001480, ENSRNOG00000013717, ENSRNOG00000022067, ENSRNOG00000007159, |            |          |           |                 |            |           |          |

|                  |                                                          |    |      |          |       |                                                                                                                                                                                                                                                                                                                                                                                                                                                                                                                                                                                                                                                                                                                                                                                                                                                                                                                                                                                              |                                                                                                                                                                                                                                                                                                                                                                                                                                                                                                                                                                                                                                                                                                                                                                                                                                                                                                                                                                                              |                                                                                                                                                                                                                                                                                                                                                                                                                                                                                                                                                                                                                                                                                                                                                                                                                                                                                                 |     |       |       |          |          |          |          |
|------------------|----------------------------------------------------------|----|------|----------|-------|----------------------------------------------------------------------------------------------------------------------------------------------------------------------------------------------------------------------------------------------------------------------------------------------------------------------------------------------------------------------------------------------------------------------------------------------------------------------------------------------------------------------------------------------------------------------------------------------------------------------------------------------------------------------------------------------------------------------------------------------------------------------------------------------------------------------------------------------------------------------------------------------------------------------------------------------------------------------------------------------|----------------------------------------------------------------------------------------------------------------------------------------------------------------------------------------------------------------------------------------------------------------------------------------------------------------------------------------------------------------------------------------------------------------------------------------------------------------------------------------------------------------------------------------------------------------------------------------------------------------------------------------------------------------------------------------------------------------------------------------------------------------------------------------------------------------------------------------------------------------------------------------------------------------------------------------------------------------------------------------------|-------------------------------------------------------------------------------------------------------------------------------------------------------------------------------------------------------------------------------------------------------------------------------------------------------------------------------------------------------------------------------------------------------------------------------------------------------------------------------------------------------------------------------------------------------------------------------------------------------------------------------------------------------------------------------------------------------------------------------------------------------------------------------------------------------------------------------------------------------------------------------------------------|-----|-------|-------|----------|----------|----------|----------|
| GOTERM_BP_DIRECT | GO:0042554<br>superoxide anion generation                | 10 | 1.10 | 3.08E-08 | -7.51 | ENSRNOG0000004404,<br>ENSRNOG0000005810,<br>ENSRNOG0000002723,<br>ENSRNOG00000013014,<br>ENSRNOG00000070745,<br>ENSRNOG00000003170,<br>ENSRNOG00000021166,<br>ENSRNOG00000028016,<br>ENSRNOG00000046261,<br>ENSRNOG0000004063,<br>ENSRNOG0000001480,<br>ENSRNOG00000009848,<br>ENSRNOG00000025051,<br>ENSRNOG00000054695,<br>ENSRNOG00000050190,<br>ENSRNOG00000027357,<br>ENSRNOG00000029768,<br>ENSRNOG0000001414,<br>ENSRNOG00000014117,<br>ENSRNOG00000021166,<br>ENSRNOG00000021004,<br>ENSRNOG00000009848,<br>ENSRNOG00000042905,<br>ENSRNOG00000047706,<br>ENSRNOG00000013280,<br>ENSRNOG00000013717,<br>ENSRNOG00000012749,<br>ENSRNOG00000004647,<br>ENSRNOG00000011478,<br>ENSRNOG00000067968,<br>ENSRNOG00000067740,<br>ENSRNOG00000054008,<br>ENSRNOG00000070745,<br>ENSRNOG00000017625,<br>ENSRNOG00000014956,<br>ENSRNOG00000046216,<br>ENSRNOG00000003442,<br>ENSRNOG00000000940,<br>ENSRNOG00000053550,<br>ENSRNOG00000060087,<br>ENSRNOG00000046829,<br>ENSRNOG00000017208, | ENSRNOG00000029768,<br>ENSRNOG0000004249,<br>ENSRNOG00000029949,<br>ENSRNOG00000013231,<br>ENSRNOG00000016535,<br>ENSRNOG00000043451,<br>ENSRNOG00000009131,<br>ENSRNOG00000003622,<br>ENSRNOG00000025117,<br>ENSRNOG00000019048,<br>ENSRNOG0000007865,<br>ENSRNOG00000056836,<br>ENSRNOG00000021318,<br>ENSRNOG00000008313,<br>ENSRNOG00000008990,<br>ENSRNOG00000028713,<br>ENSRNOG00000046829,<br>ENSRNOG00000013887,<br>ENSRNOG00000008587,<br>ENSRNOG00000009131,<br>ENSRNOG00000004067,<br>ENSRNOG00000050898,<br>ENSRNOG00000050430,<br>ENSRNOG00000049829,<br>ENSRNOG00000021155,<br>ENSRNOG0000007002,<br>ENSRNOG00000047571,<br>ENSRNOG0000004249,<br>ENSRNOG00000032596,<br>ENSRNOG0000004062,<br>ENSRNOG00000025100,<br>ENSRNOG0000004647,<br>ENSRNOG00000018445,<br>ENSRNOG00000022975,<br>ENSRNOG00000024931,<br>ENSRNOG00000017819,<br>ENSRNOG00000032247,<br>ENSRNOG00000010853,<br>ENSRNOG00000011054,<br>ENSRNOG00000018445,<br>ENSRNOG00000020369,<br>ENSRNOG00000015603, | ENSRNOG0000002227,<br>ENSRNOG00000018390,<br>ENSRNOG00000053272,<br>ENSRNOG00000014156,<br>ENSRNOG00000017208,<br>ENSRNOG00000014956,<br>ENSRNOG00000033348,<br>ENSRNOG00000020353,<br>ENSRNOG00000013014,<br>ENSRNOG0000004712,<br>ENSRNOG00000010233,<br>ENSRNOG00000016248,<br>ENSRNOG00000066008,<br>ENSRNOG00000062882,<br>ENSRNOG00000000940,<br>ENSRNOG0000006281,<br>ENSRNOG00000017208,<br>ENSRNOG00000069521,<br>ENSRNOG00000000855,<br>ENSRNOG00000010031,<br>ENSRNOG00000065254,<br>ENSRNOG00000021157,<br>ENSRNOG0000002385,<br>ENSRNOG00000054129,<br>ENSRNOG00000030712,<br>ENSRNOG00000070745,<br>ENSRNOG00000045595,<br>ENSRNOG00000026310,<br>ENSRNOG0000004226,<br>ENSRNOG00000019336,<br>ENSRNOG00000026306,<br>ENSRNOG00000008588,<br>ENSRNOG0000002227,<br>ENSRNOG0000004517,<br>ENSRNOG00000070745,<br>ENSRNOG00000027938,<br>ENSRNOG00000013887,<br>ENSRNOG00000065935, | 778 | 20    | 19234 | 12.36    | 1.26E-04 | 6.30E-05 | 6.23E-05 |
| GOTERM_BP_DIRECT | GO:0001525<br>angiogenesis                               | 30 | 3.30 | 8.43E-08 | -7.07 | ENSRNOG00000007865,<br>ENSRNOG00000056836,<br>ENSRNOG00000021318,<br>ENSRNOG00000008313,<br>ENSRNOG00000008990,<br>ENSRNOG00000028713,<br>ENSRNOG00000046829,<br>ENSRNOG00000013887,<br>ENSRNOG00000008587,<br>ENSRNOG00000009131,<br>ENSRNOG00000004067,<br>ENSRNOG00000050898,<br>ENSRNOG00000050430,<br>ENSRNOG00000049829,<br>ENSRNOG00000021155,<br>ENSRNOG0000007002,<br>ENSRNOG00000047571,<br>ENSRNOG0000004249,<br>ENSRNOG00000032596,<br>ENSRNOG0000004062,<br>ENSRNOG00000025100,<br>ENSRNOG0000004647,<br>ENSRNOG00000018445,<br>ENSRNOG00000022975,<br>ENSRNOG00000024931,<br>ENSRNOG00000017819,<br>ENSRNOG00000032247,<br>ENSRNOG00000010853,<br>ENSRNOG00000011054,<br>ENSRNOG00000018445,<br>ENSRNOG00000020369,<br>ENSRNOG00000015603,                                                                                                                                                                                                                                     | ENSRNOG0000004712,<br>ENSRNOG00000010233,<br>ENSRNOG00000016248,<br>ENSRNOG00000066008,<br>ENSRNOG00000062882,<br>ENSRNOG00000000940,<br>ENSRNOG0000006281,<br>ENSRNOG00000017208,<br>ENSRNOG00000069521,<br>ENSRNOG00000000855,<br>ENSRNOG00000010031,<br>ENSRNOG00000065254,<br>ENSRNOG00000021157,<br>ENSRNOG0000002385,<br>ENSRNOG00000054129,<br>ENSRNOG00000030712,<br>ENSRNOG00000070745,<br>ENSRNOG00000045595,<br>ENSRNOG00000026310,<br>ENSRNOG0000004226,<br>ENSRNOG00000019336,<br>ENSRNOG00000026306,<br>ENSRNOG00000008588,<br>ENSRNOG0000002227,<br>ENSRNOG0000004517,<br>ENSRNOG00000070745,<br>ENSRNOG00000027938,<br>ENSRNOG00000013887,<br>ENSRNOG00000065935,                                                                                                                                                                                                                                                                                                            | 778                                                                                                                                                                                                                                                                                                                                                                                                                                                                                                                                                                                                                                                                                                                                                                                                                                                                                             | 234 | 19234 | 3.17  | 3.45E-04 | 6.90E-05 | 6.83E-05 |          |
| GOTERM_BP_DIRECT | GO:0006955<br>immune response                            | 33 | 3.63 | 2.17E-07 | -6.66 | ENSRNOG00000013717,<br>ENSRNOG00000012749,<br>ENSRNOG00000004647,<br>ENSRNOG00000011478,<br>ENSRNOG00000067968,<br>ENSRNOG00000067740,<br>ENSRNOG00000054008,<br>ENSRNOG00000070745,<br>ENSRNOG00000017625,<br>ENSRNOG00000014956,<br>ENSRNOG00000046216,<br>ENSRNOG00000003442,<br>ENSRNOG00000000940,<br>ENSRNOG00000053550,<br>ENSRNOG00000060087,<br>ENSRNOG00000046829,<br>ENSRNOG00000017208,                                                                                                                                                                                                                                                                                                                                                                                                                                                                                                                                                                                          | ENSRNOG0000007002,<br>ENSRNOG00000047571,<br>ENSRNOG0000004249,<br>ENSRNOG00000032596,<br>ENSRNOG0000004062,<br>ENSRNOG00000025100,<br>ENSRNOG0000004647,<br>ENSRNOG00000018445,<br>ENSRNOG00000022975,<br>ENSRNOG00000024931,<br>ENSRNOG00000017819,<br>ENSRNOG00000032247,<br>ENSRNOG00000010853,<br>ENSRNOG00000011054,<br>ENSRNOG00000018445,<br>ENSRNOG00000020369,<br>ENSRNOG00000015603,                                                                                                                                                                                                                                                                                                                                                                                                                                                                                                                                                                                              | ENSRNOG0000002385,<br>ENSRNOG00000054129,<br>ENSRNOG00000030712,<br>ENSRNOG00000070745,<br>ENSRNOG00000045595,<br>ENSRNOG00000026310,<br>ENSRNOG0000004226,<br>ENSRNOG00000019336,<br>ENSRNOG00000026306,<br>ENSRNOG00000008588,<br>ENSRNOG0000002227,<br>ENSRNOG0000004517,<br>ENSRNOG00000070745,<br>ENSRNOG00000027938,<br>ENSRNOG00000013887,<br>ENSRNOG00000065935,                                                                                                                                                                                                                                                                                                                                                                                                                                                                                                                        | 778 | 287   | 19234 | 2.84     | 8.87E-04 | 1.48E-04 | 1.46E-04 |
| GOTERM_BP_DIRECT | GO:0001819<br>positive regulation of cytokine production | 15 | 1.65 | 5.45E-06 | -5.26 | ENSRNOG00000017625,<br>ENSRNOG00000014956,<br>ENSRNOG00000046216,<br>ENSRNOG00000003442,<br>ENSRNOG00000000940,<br>ENSRNOG00000053550,<br>ENSRNOG00000060087,<br>ENSRNOG00000046829,<br>ENSRNOG00000017208,                                                                                                                                                                                                                                                                                                                                                                                                                                                                                                                                                                                                                                                                                                                                                                                  | ENSRNOG0000004647,<br>ENSRNOG00000018445,<br>ENSRNOG00000022975,<br>ENSRNOG00000024931,<br>ENSRNOG00000017819,<br>ENSRNOG00000032247,<br>ENSRNOG00000010853,<br>ENSRNOG00000011054,<br>ENSRNOG00000018445,<br>ENSRNOG00000020369,<br>ENSRNOG00000015603,                                                                                                                                                                                                                                                                                                                                                                                                                                                                                                                                                                                                                                                                                                                                     | ENSRNOG0000004226,<br>ENSRNOG00000019336,<br>ENSRNOG00000026306,<br>ENSRNOG00000008588,<br>ENSRNOG0000002227,<br>ENSRNOG0000004517,<br>ENSRNOG00000070745,<br>ENSRNOG00000027938,<br>ENSRNOG00000013887,<br>ENSRNOG00000065935,                                                                                                                                                                                                                                                                                                                                                                                                                                                                                                                                                                                                                                                                 | 778 | 83    | 19234 | 4.47     | 2.21E-02 | 2.23E-03 | 2.21E-03 |
| GOTERM_BP_DIRECT | GO:0043410<br>positive regulation of MAPK cascade        | 22 | 2.42 | 6.28E-05 | -4.20 | ENSRNOG00000000940,<br>ENSRNOG00000053550,<br>ENSRNOG00000060087,<br>ENSRNOG00000046829,<br>ENSRNOG00000017208,                                                                                                                                                                                                                                                                                                                                                                                                                                                                                                                                                                                                                                                                                                                                                                                                                                                                              | ENSRNOG00000010853,<br>ENSRNOG00000011054,<br>ENSRNOG00000018445,<br>ENSRNOG00000020369,<br>ENSRNOG00000015603,                                                                                                                                                                                                                                                                                                                                                                                                                                                                                                                                                                                                                                                                                                                                                                                                                                                                              | ENSRNOG0000004517,<br>ENSRNOG00000070745,<br>ENSRNOG00000027938,<br>ENSRNOG00000013887,<br>ENSRNOG00000065935,                                                                                                                                                                                                                                                                                                                                                                                                                                                                                                                                                                                                                                                                                                                                                                                  | 778 | 200   | 19234 | 2.72     | 2.27E-01 | 1.28E-02 | 1.26E-02 |

|           |                     |       |       |          |        |                                                             |     |      |       |       |          |          |          |  |  |  |  |  |
|-----------|---------------------|-------|-------|----------|--------|-------------------------------------------------------------|-----|------|-------|-------|----------|----------|----------|--|--|--|--|--|
|           |                     |       |       |          |        | ENSRNOG00000008587, ENSRNOG00000007002, ENSRNOG00000027894  |     |      |       |       |          |          |          |  |  |  |  |  |
|           |                     |       |       |          |        | ENSRNOG00000031930, ENSRNOG00000009848, ENSRNOG00000004712, |     |      |       |       |          |          |          |  |  |  |  |  |
|           |                     |       |       |          |        | ENSRNOG00000027030, ENSRNOG00000036942, ENSRNOG00000050697, |     |      |       |       |          |          |          |  |  |  |  |  |
|           |                     |       |       |          |        | ENSRNOG00000052510, ENSRNOG00000010031, ENSRNOG00000018445, |     |      |       |       |          |          |          |  |  |  |  |  |
|           |                     |       |       |          |        | ENSRNOG00000020369, ENSRNOG00000016945, ENSRNOG00000004033, |     |      |       |       |          |          |          |  |  |  |  |  |
|           |                     |       |       |          |        | ENSRNOG00000013717, ENSRNOG00000066008, ENSRNOG00000053675, |     |      |       |       |          |          |          |  |  |  |  |  |
|           |                     |       |       |          |        | ENSRNOG00000028896, ENSRNOG00000006720, ENSRNOG00000053272, |     |      |       |       |          |          |          |  |  |  |  |  |
|           |                     |       |       |          |        | ENSRNOG00000033564, ENSRNOG00000033444, ENSRNOG00000001955, |     |      |       |       |          |          |          |  |  |  |  |  |
|           |                     |       |       |          |        | ENSRNOG00000032596, ENSRNOG00000070745, ENSRNOG00000017409, |     |      |       |       |          |          |          |  |  |  |  |  |
|           |                     |       |       |          |        | ENSRNOG00000003172, ENSRNOG00000067740, ENSRNOG00000010935, |     |      |       |       |          |          |          |  |  |  |  |  |
|           |                     |       |       |          |        | ENSRNOG00000009826, ENSRNOG00000020380, ENSRNOG00000030625, |     |      |       |       |          |          |          |  |  |  |  |  |
|           |                     |       |       |          |        | ENSRNOG00000011107, ENSRNOG00000028548, ENSRNOG00000003969, |     |      |       |       |          |          |          |  |  |  |  |  |
|           |                     |       |       |          |        | ENSRNOG00000001827, ENSRNOG00000030462, ENSRNOG00000030187, |     |      |       |       |          |          |          |  |  |  |  |  |
|           |                     |       |       |          |        | ENSRNOG00000013973, ENSRNOG00000014426, ENSRNOG00000065935, |     |      |       |       |          |          |          |  |  |  |  |  |
|           |                     |       |       |          |        | ENSRNOG00000050190, ENSRNOG00000023257, ENSRNOG00000017819, |     |      |       |       |          |          |          |  |  |  |  |  |
|           |                     |       |       |          |        | ENSRNOG00000007002, ENSRNOG00000006033, ENSRNOG00000043387, |     |      |       |       |          |          |          |  |  |  |  |  |
|           |                     |       |       |          |        | ENSRNOG00000026650, ENSRNOG00000047571, ENSRNOG00000010645, |     |      |       |       |          |          |          |  |  |  |  |  |
|           |                     |       |       |          |        | ENSRNOG00000029768, ENSRNOG00000004404, ENSRNOG00000004647, |     |      |       |       |          |          |          |  |  |  |  |  |
|           |                     |       |       |          |        | ENSRNOG00000002227, ENSRNOG00000001414, ENSRNOG00000017381, |     |      |       |       |          |          |          |  |  |  |  |  |
|           |                     |       |       |          |        | ENSRNOG00000042326, ENSRNOG00000019689, ENSRNOG00000067968, |     |      |       |       |          |          |          |  |  |  |  |  |
| GOTERM_CC | GO:0005615          | 1.22E | 13.42 | 2.70E-11 | -10.57 | ENSRNOG00000001092, ENSRNOG00000024115, ENSRNOG00000008680, | 808 | 1609 | 19758 | 1.85  | 1.46E-08 | 8.96E-09 | 8.75E-09 |  |  |  |  |  |
| _DIRECT   | extracellular space | +02   |       |          |        | ENSRNOG00000003666, ENSRNOG00000050898, ENSRNOG00000042905, |     |      |       |       |          |          |          |  |  |  |  |  |
|           |                     |       |       |          |        | ENSRNOG00000004517, ENSRNOG00000011320, ENSRNOG00000020716, |     |      |       |       |          |          |          |  |  |  |  |  |
|           |                     |       |       |          |        | ENSRNOG00000020206, ENSRNOG00000049829, ENSRNOG00000013064, |     |      |       |       |          |          |          |  |  |  |  |  |
|           |                     |       |       |          |        | ENSRNOG00000046834, ENSRNOG00000017438, ENSRNOG00000025332, |     |      |       |       |          |          |          |  |  |  |  |  |
|           |                     |       |       |          |        | ENSRNOG00000025581, ENSRNOG00000006368, ENSRNOG00000004222, |     |      |       |       |          |          |          |  |  |  |  |  |
|           |                     |       |       |          |        | ENSRNOG00000006802, ENSRNOG00000046261, ENSRNOG00000005679, |     |      |       |       |          |          |          |  |  |  |  |  |
|           |                     |       |       |          |        | ENSRNOG00000000940, ENSRNOG00000050767, ENSRNOG00000002723, |     |      |       |       |          |          |          |  |  |  |  |  |
|           |                     |       |       |          |        | ENSRNOG00000029949, ENSRNOG00000014171, ENSRNOG00000059579, |     |      |       |       |          |          |          |  |  |  |  |  |
|           |                     |       |       |          |        | ENSRNOG00000050761, ENSRNOG00000009350, ENSRNOG00000017206, |     |      |       |       |          |          |          |  |  |  |  |  |
|           |                     |       |       |          |        | ENSRNOG00000009597, ENSRNOG00000004062, ENSRNOG00000006641, |     |      |       |       |          |          |          |  |  |  |  |  |
|           |                     |       |       |          |        | ENSRNOG00000022353, ENSRNOG00000032569, ENSRNOG00000001469, |     |      |       |       |          |          |          |  |  |  |  |  |
|           |                     |       |       |          |        | ENSRNOG00000003649, ENSRNOG00000000815, ENSRNOG00000012110, |     |      |       |       |          |          |          |  |  |  |  |  |
|           |                     |       |       |          |        | ENSRNOG00000003807, ENSRNOG00000047706, ENSRNOG00000015675, |     |      |       |       |          |          |          |  |  |  |  |  |
|           |                     |       |       |          |        | ENSRNOG00000013280, ENSRNOG00000021155, ENSRNOG00000023576, |     |      |       |       |          |          |          |  |  |  |  |  |
|           |                     |       |       |          |        | ENSRNOG00000021157, ENSRNOG00000005386, ENSRNOG00000062101, |     |      |       |       |          |          |          |  |  |  |  |  |
|           |                     |       |       |          |        | ENSRNOG00000002385, ENSRNOG00000007159, ENSRNOG00000030712, |     |      |       |       |          |          |          |  |  |  |  |  |
|           |                     |       |       |          |        | ENSRNOG00000017063, ENSRNOG00000051235, ENSRNOG00000018952, |     |      |       |       |          |          |          |  |  |  |  |  |
|           |                     |       |       |          |        | ENSRNOG00000016535, ENSRNOG00000028072, ENSRNOG00000013668, |     |      |       |       |          |          |          |  |  |  |  |  |
|           |                     |       |       |          |        | ENSRNOG00000043451, ENSRNOG00000021166, ENSRNOG00000045595, |     |      |       |       |          |          |          |  |  |  |  |  |
|           |                     |       |       |          |        | ENSRNOG00000005770                                          |     |      |       |       |          |          |          |  |  |  |  |  |
| GOTERM_CC | GO:0043020          | 6.00E | 0.66  | 7.00E-05 | -4.16  | ENSRNOG00000028016, ENSRNOG00000003622, ENSRNOG00000033348, | 808 | 12   | 19758 | 12.23 | 3.69E-02 | 3.83E-03 | 3.74E-03 |  |  |  |  |  |



|                  |                                                              |     |      |          |       |                                                                                                    |     |    |       |       |          |          |          |  |  |
|------------------|--------------------------------------------------------------|-----|------|----------|-------|----------------------------------------------------------------------------------------------------|-----|----|-------|-------|----------|----------|----------|--|--|
| _DIRECT          | NADPH oxidase complex<br>GO:0016176<br>superoxide-generating | +00 |      |          |       | ENSRNOG00000025117, ENSRNOG00000013014, ENSRNOG00000001480                                         |     |    |       |       |          |          |          |  |  |
| GOTERM_MF_DIRECT | NADPH oxidase activator activity<br>GO:0016175               | 5   | 0.55 | 1.67E-04 | -3.78 | ENSRNOG00000028016, ENSRNOG00000025117, ENSRNOG00000020353, ENSRNOG00000004063, ENSRNOG00000001480 | 724 | 8  | 17765 | 15.34 | 1.54E-01 | 3.62E-02 | 3.57E-02 |  |  |
| GOTERM_MF_DIRECT | superoxide-generating<br>NADPH oxidase activity              | 5   | 0.55 | 4.69E-04 | -3.33 | ENSRNOG00000028016, ENSRNOG00000003622, ENSRNOG00000033348, ENSRNOG00000013014, ENSRNOG00000001480 | 724 | 10 | 17765 | 12.27 | 3.74E-01 | 5.21E-02 | 5.14E-02 |  |  |

EA-1mA vs COPD

| Category         | Term                                                     | Count | %    | P Value  | Log P value | Genes                                                                                                                                                                                                                                                                                                                                              | List Total | Pop Hits | Pop Total | Fold Enrichment | Bonferroni | Benjamini | FDR      |
|------------------|----------------------------------------------------------|-------|------|----------|-------------|----------------------------------------------------------------------------------------------------------------------------------------------------------------------------------------------------------------------------------------------------------------------------------------------------------------------------------------------------|------------|----------|-----------|-----------------|------------|-----------|----------|
| GOTERM_BP_DIRECT | GO:0045087<br>innate immune response                     | 18    | 5.81 | 3.27E-05 | -4.48       | ENSRNOG00000003622, ENSRNOG00000005810, ENSRNOG00000009912, ENSRNOG00000010347, ENSRNOG00000004249, ENSRNOG00000051235, ENSRNOG00000046834, ENSRNOG00000022859, ENSRNOG00000013973, ENSRNOG00000034190, ENSRNOG00000026306, ENSRNOG00000003170, ENSRNOG00000024159, ENSRNOG00000024115, ENSRNOG00000065128, ENSRNOG00000009331, ENSRNOG00000006033 | 254        | 410      | 19234     | 3.32            | 6.08E-02   | 3.13E-02  | 3.11E-02 |
| GOTERM_BP_DIRECT | GO:0001819<br>positive regulation of cytokine production | 8     | 2.58 | 1.11E-04 | -3.95       | ENSRNOG00000018445, ENSRNOG00000022975, ENSRNOG00000004647, ENSRNOG00000004226, ENSRNOG00000009912, ENSRNOG00000026306, ENSRNOG00000014956, ENSRNOG00000008588                                                                                                                                                                                     | 254        | 83       | 19234     | 7.30            | 1.92E-01   | 5.32E-02  | 5.28E-02 |
| GOTERM_BP_DIRECT | GO:0071222<br>cellular response to lipopolysaccharide    | 14    | 4.52 | 1.53E-04 | -3.81       | ENSRNOG00000003244, ENSRNOG00000004763, ENSRNOG00000024382, ENSRNOG00000004647, ENSRNOG00000019120, ENSRNOG00000018251, ENSRNOG00000020716, ENSRNOG00000018598, ENSRNOG00000037563, ENSRNOG00000022859, ENSRNOG00000013973, ENSRNOG00000003170, ENSRNOG00000009131, ENSRNOG00000006033                                                             | 254        | 295      | 19234     | 3.59            | 2.55E-01   | 5.87E-02  | 5.83E-02 |
| GOTERM_BP_DIRECT | GO:0050776<br>regulation of immune response              | 6     | 1.94 | 9.83E-04 | -3.01       | ENSRNOG00000024382, ENSRNOG00000001425, ENSRNOG00000037339, ENSRNOG00000024159, ENSRNOG00000007664, ENSRNOG00000049422                                                                                                                                                                                                                             | 254        | 58       | 19234     | 7.83            | 8.48E-01   | 1.88E-01  | 1.87E-01 |
| GOTERM_BP_DIRECT | GO:0001818<br>negative regulation of                     | 5     | 1.61 | 1.67E-03 | -2.78       | ENSRNOG00000008816, ENSRNOG00000004647, ENSRNOG00000014956, ENSRNOG00000008839, ENSRNOG00000020716                                                                                                                                                                                                                                                 | 254        | 39       | 19234     | 9.71            | 9.60E-01   | 2.25E-01  | 2.23E-01 |

|                  |                                                                 |     |       |          |       |                                                                                                                                                                                                                                                                                                                                                                                                                                                                                                                                                                                                                                                                                                                                                                                                                                                                                                                                                                                                                                                                                                                                                                                                                                                                                                                                                                                                                                                                                                                                                                                                                                                                                                                                                                                                                                                                       |     |      |       |      |          |          |          |
|------------------|-----------------------------------------------------------------|-----|-------|----------|-------|-----------------------------------------------------------------------------------------------------------------------------------------------------------------------------------------------------------------------------------------------------------------------------------------------------------------------------------------------------------------------------------------------------------------------------------------------------------------------------------------------------------------------------------------------------------------------------------------------------------------------------------------------------------------------------------------------------------------------------------------------------------------------------------------------------------------------------------------------------------------------------------------------------------------------------------------------------------------------------------------------------------------------------------------------------------------------------------------------------------------------------------------------------------------------------------------------------------------------------------------------------------------------------------------------------------------------------------------------------------------------------------------------------------------------------------------------------------------------------------------------------------------------------------------------------------------------------------------------------------------------------------------------------------------------------------------------------------------------------------------------------------------------------------------------------------------------------------------------------------------------|-----|------|-------|------|----------|----------|----------|
| GOTERM_BP_DIRECT | cytokine production<br>GO:0006909<br>phagocytosis<br>GO:0050728 | 6   | 1.94  | 2.43E-03 | -2.61 | ENSRNOG00000028016, ENSRNOG00000013641, ENSRNOG00000014956, ENSRNOG00000020716, ENSRNOG00000009331, ENSRNOG00000050430                                                                                                                                                                                                                                                                                                                                                                                                                                                                                                                                                                                                                                                                                                                                                                                                                                                                                                                                                                                                                                                                                                                                                                                                                                                                                                                                                                                                                                                                                                                                                                                                                                                                                                                                                | 254 | 71   | 19234 | 6.40 | 9.91E-01 | 2.39E-01 | 2.37E-01 |
| GOTERM_BP_DIRECT | negative regulation of inflammatory response<br>GO:0030593      | 8   | 2.58  | 2.17E-03 | -2.66 | ENSRNOG00000004763, ENSRNOG00000054964, ENSRNOG00000042326, ENSRNOG00000011071, ENSRNOG00000004647, ENSRNOG00000003170, ENSRNOG00000012972, ENSRNOG00000008839                                                                                                                                                                                                                                                                                                                                                                                                                                                                                                                                                                                                                                                                                                                                                                                                                                                                                                                                                                                                                                                                                                                                                                                                                                                                                                                                                                                                                                                                                                                                                                                                                                                                                                        | 254 | 136  | 19234 | 4.45 | 9.84E-01 | 2.39E-01 | 2.37E-01 |
| GOTERM_BP_DIRECT | neutrophil chemotaxis<br>GO:0030593                             | 6   | 1.94  | 3.09E-03 | -2.51 | ENSRNOG00000022859, ENSRNOG00000029768, ENSRNOG00000024159, ENSRNOG00000013748, ENSRNOG00000049422, ENSRNOG00000050430                                                                                                                                                                                                                                                                                                                                                                                                                                                                                                                                                                                                                                                                                                                                                                                                                                                                                                                                                                                                                                                                                                                                                                                                                                                                                                                                                                                                                                                                                                                                                                                                                                                                                                                                                | 254 | 75   | 19234 | 6.06 | 9.97E-01 | 2.57E-01 | 2.55E-01 |
| GOTERM_CC_DIRECT | plasma membrane<br>GO:0005886                                   | 107 | 34.52 | 5.68E-06 | -5.25 | ENSRNOG00000003622, ENSRNOG00000017072, ENSRNOG00000058337, ENSRNOG00000019412, ENSRNOG00000054013, ENSRNOG00000013674, ENSRNOG00000058692, ENSRNOG00000018606, ENSRNOG00000004150, ENSRNOG00000004393, ENSRNOG00000002372, ENSRNOG00000028930, ENSRNOG00000000187, ENSRNOG00000026592, ENSRNOG00000052064, ENSRNOG00000053430, ENSRNOG00000017521, ENSRNOG00000043478, ENSRNOG00000013564, ENSRNOG00000014653, ENSRNOG00000011071, ENSRNOG00000045816, ENSRNOG00000019549, ENSRNOG00000024578, ENSRNOG00000009797, ENSRNOG00000001270, ENSRNOG00000009033, ENSRNOG00000029740, ENSRNOG00000061883, ENSRNOG00000057703, ENSRNOG0000005465, ENSRNOG00000011901, ENSRNOG00000030625, ENSRNOG00000036726, ENSRNOG0000001425, ENSRNOG00000010375, ENSRNOG00000020939, ENSRNOG00000010094, ENSRNOG00000016685, ENSRNOG00000018748, ENSRNOG00000003280, ENSRNOG00000068001, ENSRNOG00000024346, ENSRNOG00000004763, ENSRNOG00000052880, ENSRNOG00000004249, ENSRNOG00000030877, ENSRNOG00000017381, ENSRNOG00000051950, ENSRNOG00000020706, ENSRNOG00000004928, ENSRNOG00000042326, ENSRNOG00000036692, ENSRNOG00000022859, ENSRNOG00000019606, ENSRNOG00000043416, ENSRNOG00000014956, ENSRNOG00000021243, ENSRNOG00000007866, ENSRNOG00000054219, ENSRNOG00000012779, ENSRNOG00000004517, ENSRNOG00000020716, ENSRNOG00000012098, ENSRNOG00000046834, ENSRNOG00000018644, ENSRNOG00000026704, ENSRNOG00000026306, ENSRNOG00000007345, ENSRNOG00000006410, ENSRNOG00000049422, ENSRNOG00000003136, ENSRNOG00000019183, ENSRNOG00000004226, ENSRNOG00000009912, ENSRNOG00000010347, ENSRNOG00000018251, ENSRNOG00000011550, ENSRNOG00000037563, ENSRNOG00000027808, ENSRNOG00000021424, ENSRNOG00000003095, ENSRNOG00000015948, ENSRNOG00000004067, ENSRNOG00000026310, ENSRNOG00000006116, ENSRNOG00000005388, ENSRNOG00000008816, ENSRNOG00000024382, ENSRNOG00000037339, | 268 | 5376 | 19758 | 1.47 | 1.70E-03 | 8.53E-04 | 8.41E-04 |

|                  |                                                         |   |      |          |       |                                                                                                                                                                                                                                                                                                                                                    |     |     |       |      |          |          |          |  |  |
|------------------|---------------------------------------------------------|---|------|----------|-------|----------------------------------------------------------------------------------------------------------------------------------------------------------------------------------------------------------------------------------------------------------------------------------------------------------------------------------------------------|-----|-----|-------|------|----------|----------|----------|--|--|
|                  |                                                         |   |      |          |       | ENSRNOG00000018268, ENSRNOG00000037331, ENSRNOG00000017976, ENSRNOG00000013280, ENSRNOG00000014227, ENSRNOG00000023214, ENSRNOG00000046972, ENSRNOG00000001571, ENSRNOG00000012628, ENSRNOG00000008409, ENSRNOG00000011016, ENSRNOG00000058422, ENSRNOG00000018790, ENSRNOG00000051235, ENSRNOG00000034075, ENSRNOG00000024159, ENSRNOG00000009331 |     |     |       |      |          |          |          |  |  |
| GOTERM_MF_DIRECT | GO:0004888<br>transmembrane signaling receptor activity | 9 | 2.90 | 3.68E-04 | -3.43 | ENSRNOG00000003136, ENSRNOG00000024382, ENSRNOG00000022975, ENSRNOG00000021424, ENSRNOG00000036726, ENSRNOG00000004249, ENSRNOG00000004393, ENSRNOG00000018251, ENSRNOG00000049422                                                                                                                                                                 | 239 | 130 | 17765 | 5.15 | 1.72E-01 | 1.89E-01 | 1.88E-01 |  |  |

EA-3mA vs COPD

| Category         | Term                                                                        | Count | %    | P Value  | Log P value | Genes                                                                                                                                                                                                                                                                                                                                                                                      | List Total | Pop Hits | Pop Total | Fold Enrichment | Bonferroni | Benjamini | FDR      |
|------------------|-----------------------------------------------------------------------------|-------|------|----------|-------------|--------------------------------------------------------------------------------------------------------------------------------------------------------------------------------------------------------------------------------------------------------------------------------------------------------------------------------------------------------------------------------------------|------------|----------|-----------|-----------------|------------|-----------|----------|
| GOTERM_BP_DIRECT | GO:0001525<br>angiogenesis                                                  | 19    | 5.05 | 5.06E-08 | -7.30       | ENSRNOG00000007865, ENSRNOG00000003587, ENSRNOG00000007830, ENSRNOG00000028713, ENSRNOG00000007726, ENSRNOG00000056836, ENSRNOG00000003984, ENSRNOG00000012991, ENSRNOG00000013683, ENSRNOG00000060381, ENSRNOG00000046829, ENSRNOG00000021536, ENSRNOG00000017208, ENSRNOG00000055293, ENSRNOG00000050190, ENSRNOG00000021166, ENSRNOG00000021004, ENSRNOG00000008313, ENSRNOG00000008990 | 311        | 234      | 19234     | 5.02            | 1.06E-04   | 1.06E-04  | 1.06E-04 |
| GOTERM_BP_DIRECT | GO:0071560<br>cellular response to transforming growth factor beta stimulus | 9     | 2.39 | 4.11E-04 | -3.39       | ENSRNOG00000025042, ENSRNOG00000007302, ENSRNOG00000028713, ENSRNOG00000056836, ENSRNOG0000001469, ENSRNOG00000004704, ENSRNOG00000018598, ENSRNOG00000052510, ENSRNOG00000012660                                                                                                                                                                                                          | 311        | 110      | 19234     | 5.06            | 5.79E-01   | 1.44E-01  | 1.44E-01 |
| GOTERM_BP_DIRECT | GO:0032496<br>response to lipopolysaccharide                                | 14    | 3.72 | 6.76E-04 | -3.17       | ENSRNOG00000028016, ENSRNOG00000000187, ENSRNOG00000010997, ENSRNOG00000027030, ENSRNOG00000011107, ENSRNOG00000004226, ENSRNOG00000012840, ENSRNOG00000030285, ENSRNOG00000000838, ENSRNOG00000009260, ENSRNOG00000014443, ENSRNOG00000019549, ENSRNOG00000014956, ENSRNOG00000008680                                                                                                     | 311        | 281      | 19234     | 3.08            | 7.59E-01   | 1.78E-01  | 1.77E-01 |
| GOTERM_BP_DIRECT | GO:0019934<br>cGMP-mediated signaling                                       | 5     | 1.33 | 1.14E-03 | -2.94       | ENSRNOG00000025042, ENSRNOG00000010997, ENSRNOG00000012060, ENSRNOG00000030877, ENSRNOG00000053728                                                                                                                                                                                                                                                                                         | 311        | 29       | 19234     | 10.66           | 9.10E-01   | 2.41E-01  | 2.41E-01 |
| GOTERM_BP_DIRECT | GO:0071260<br>cellular response to mechanical stimulus                      | 8     | 2.13 | 7.11E-03 | -2.15       | ENSRNOG00000038483, ENSRNOG00000032973, ENSRNOG00000033090, ENSRNOG00000056836, ENSRNOG00000050190, ENSRNOG00000018598, ENSRNOG00000013717, ENSRNOG00000038784                                                                                                                                                                                                                             | 311        | 138      | 19234     | 3.59            | 1.00E+00   | 6.07E-01  | 6.05E-01 |
| GOTERM_BP        | GO:0007267                                                                  | 6     | 1.60 | 6.11E-03 | -2.21       | ENSRNOG00000053675, ENSRNOG00000060087, ENSRNOG00000008816,                                                                                                                                                                                                                                                                                                                                | 311        | 72       | 19234     | 5.15            | 1.00E+00   | 6.07E-01  | 6.05E-01 |



|                  |                                                            |    |      |          |       |                                                                                                                                                                                                                                                                                                                                                                                                                                                                                                                                                                                                                                                                                                                                                                                                                                                                                                                                                                                                                                                                                                                                                                                     |     |     |       |       |          |          |          |
|------------------|------------------------------------------------------------|----|------|----------|-------|-------------------------------------------------------------------------------------------------------------------------------------------------------------------------------------------------------------------------------------------------------------------------------------------------------------------------------------------------------------------------------------------------------------------------------------------------------------------------------------------------------------------------------------------------------------------------------------------------------------------------------------------------------------------------------------------------------------------------------------------------------------------------------------------------------------------------------------------------------------------------------------------------------------------------------------------------------------------------------------------------------------------------------------------------------------------------------------------------------------------------------------------------------------------------------------|-----|-----|-------|-------|----------|----------|----------|
| GOTERM_CC_DIRECT | GO:0098978<br>glutamatergic synapse                        | 22 | 5.85 | 2.51E-03 | -2.60 | ENSRNOG00000012344, ENSRNOG00000013781, ENSRNOG00000010161, ENSRNOG00000060054, ENSRNOG00000016412, ENSRNOG00000066033, ENSRNOG00000024712, ENSRNOG00000046683, ENSRNOG00000009177, ENSRNOG00000006611, ENSRNOG00000007865, ENSRNOG00000005700, ENSRNOG00000006877, ENSRNOG00000004810, ENSRNOG00000005519, ENSRNOG000000050767, ENSRNOG00000012840, ENSRNOG00000019365, ENSRNOG00000020839, ENSRNOG00000065255, ENSRNOG00000060054, ENSRNOG00000016412, ENSRNOG00000019018, ENSRNOG00000012060, ENSRNOG00000064362, ENSRNOG00000021984, ENSRNOG00000008970, ENSRNOG00000017606, ENSRNOG00000009862, ENSRNOG00000043085, ENSRNOG00000063400, ENSRNOG00000007302, ENSRNOG00000009949, ENSRNOG00000028627, ENSRNOG00000004810, ENSRNOG00000013324, ENSRNOG00000012058, ENSRNOG00000058337, ENSRNOG00000001827, ENSRNOG00000015675, ENSRNOG00000033090, ENSRNOG00000008970, ENSRNOG00000016826, ENSRNOG00000008135, ENSRNOG00000043085, ENSRNOG00000053675, ENSRNOG00000028335, ENSRNOG00000004346, ENSRNOG00000054964, ENSRNOG00000006565, ENSRNOG00000033348, ENSRNOG00000003998, ENSRNOG00000012840, ENSRNOG00000032350, ENSRNOG00000033064, ENSRNOG00000018557, ENSRNOG00000060054 | 322 | 655 | 19758 | 2.06  | 5.40E-01 | 6.45E-02 | 6.27E-02 |
| GOTERM_MF_DIRECT | GO:0005509<br>calcium ion binding                          | 26 | 6.91 | 1.95E-04 | -3.71 | ENSRNOG00000008135, ENSRNOG00000043085, ENSRNOG00000053675, ENSRNOG00000028335, ENSRNOG00000004346, ENSRNOG00000054964, ENSRNOG00000006565, ENSRNOG00000033348, ENSRNOG00000003998, ENSRNOG00000012840, ENSRNOG00000032350, ENSRNOG00000033064, ENSRNOG00000018557, ENSRNOG00000060054                                                                                                                                                                                                                                                                                                                                                                                                                                                                                                                                                                                                                                                                                                                                                                                                                                                                                              | 287 | 705 | 17765 | 2.28  | 1.02E-01 | 1.07E-01 | 1.07E-01 |
| GOTERM_MF_DIRECT | GO:0016175<br>superoxide-generating NADPH oxidase activity | 3  | 0.80 | 1.07E-02 | -1.97 | ENSRNOG00000028016, ENSRNOG00000033348, ENSRNOG00000001480                                                                                                                                                                                                                                                                                                                                                                                                                                                                                                                                                                                                                                                                                                                                                                                                                                                                                                                                                                                                                                                                                                                          | 287 | 10  | 17765 | 18.57 | 9.97E-01 | 9.48E-01 | 9.48E-01 |

**Supplementary Table 6 The DEGs validated with published animal studies**

| Gene ID | Description                                       | 1mA vs COPD | log2FC | P value  | 3mA vs COPD | log2FC | P value  | COPD vs Normal | log2FC | P value  | Database | PMID              |
|---------|---------------------------------------------------|-------------|--------|----------|-------------|--------|----------|----------------|--------|----------|----------|-------------------|
| Npas2   | neuronal PAS domain protein 2                     | UP          | 1.45   | 1.07E-06 | UP          | 1.82   | 1.21E-09 | DOWN           | -2.97  | 1.85E-21 | DOWN     | 29765063;28575117 |
| Clec5a  | C-type lectin domain containing 5A                | DOWN        | -1.45  | 1.11E-06 | DOWN        | -1.20  | 4.70E-05 | UP             | 1.87   | 5.60E-10 | UP       | 24663285          |
| Dcstamp | dendrocyte expressed seven transmembrane protein  | DOWN        | -1.71  | 1.03E-08 | DOWN        | -1.35  | 5.30E-06 | UP             | 1.59   | 9.41E-08 | UP       | 24663285          |
| Mrc1    | mannose receptor, C type 1                        | DOWN        | -1.75  | 4.51E-09 | DOWN        | -1.32  | 7.39E-06 | UP             | 1.55   | 1.54E-07 | UP       | 28575117          |
| Cry1    | cryptochrome circadian regulator 1                | NC          | -      | -        | DOWN        | -1.15  | 8.92E-05 | NC             | -      | -        | UP       | 25346222;19926613 |
| Csf2rb  | colony stimulating factor 2 receptor subunit beta | DOWN        | -1.61  | 6.35E-08 | DOWN        | -1.26  | 2.00E-05 | UP             | 2.13   | 2.10E-12 | UP       | 36218263          |
| Plet1   | placenta expressed transcript 1                   | DOWN        | -1.15  | 8.39E-05 | DOWN        | -1.04  | 3.74E-04 | UP             | 1.92   | 1.44E-10 | UP       | 28575117          |
| Gpnmb   | glycoprotein nmb                                  | DOWN        | -1.33  | 5.74E-06 | DOWN        | -1.18  | 5.50E-05 | UP             | 2.33   | 1.79E-14 | UP       | 28575117;35319981 |
| Akap12  | A-kinase anchoring protein 12                     | UP          | 1.07   | 2.73E-04 | UP          | 1.66   | 2.25E-08 | DOWN           | -1.68  | 1.70E-08 | DOWN     | 19698101          |

|           |                                                     |      |       |          |      |       |          |      |       |          |      |                                     |
|-----------|-----------------------------------------------------|------|-------|----------|------|-------|----------|------|-------|----------|------|-------------------------------------|
| Arntl     | aryl hydrocarbon receptor nuclear translocator-like | NC   | -     | -        | UP   | 1.34  | 6.42E-06 | DOWN | -2.57 | 5.75E-17 | DOWN | 29765063;28575117;24025728;19926613 |
| Adm       | adrenomedullin                                      | NC   | -     | -        | UP   | 1.27  | 2.12E-05 | DOWN | -1.39 | 3.28E-06 | DOWN | 28575117                            |
| Slc39a2   | solute carrier family 39 member 2                   | DOWN | -1.38 | 2.74E-06 | DOWN | -1.13 | 1.22E-04 | NC   | -     | -        | UP   | 28575117                            |
| Serpina10 | serpin family A member 10                           | NC   | -     | -        | DOWN | -1.19 | 7.85E-05 | UP   | 1.05  | 4.34E-04 | UP   | 28575117                            |
| Per2      | period circadian regulator 2                        | NC   | -     | -        | DOWN | -1.48 | 5.46E-07 | UP   | 2.81  | 1.14E-19 | UP   | 28575117;25346222;19926613          |
| Eln       | elastin                                             | NC   | -     | -        | UP   | 2.16  | 8.64E-13 | DOWN | -2.81 | 1.21E-19 | DOWN | 28575117                            |
| Foxa3     | forkhead box A3                                     | DOWN | -1.68 | 5.95E-08 | NC   | -     | -        | UP   | 1.72  | 1.33E-08 | UP   | 28575117                            |
| Fcamr     | Fc fragment of IgA and IgM receptor                 | DOWN | -1.15 | 1.47E-04 | NC   | -     | -        | NC   | -     | -        | UP   | 28575117                            |
| Msr1      | macrophage scavenger receptor 1                     | DOWN | -1.18 | 6.13E-05 | NC   | -     | -        | UP   | 2.10  | 3.60E-12 | UP   | 35319981                            |
| Lcn2      | lipocalin 2                                         | DOWN | -1.09 | 1.98E-04 | NC   | -     | -        | UP   | 3.17  | 6.30E-24 | UP   | 24663285                            |
| Vsig1     | V-set and immunoglobulin domain containing 1        | DOWN | -1.33 | 1.38E-05 | NC   | -     | -        | UP   | 1.30  | 1.49E-05 | UP   | 28575117                            |
| Aldoc     | aldolase, fructose-bisphosphate C                   | DOWN | -1.11 | 1.73E-04 | NC   | -     | -        | UP   | 1.51  | 4.07E-07 | UP   | 28575117                            |
| Nt5e      | 5' nucleotidase, ecto                               | DOWN | -1.22 | 3.27E-05 | NC   | -     | -        | UP   | 1.41  | 1.99E-06 | UP   | 28575117                            |
| Alas2     | aminolevulinic acid synthase 2, erythroid           | DOWN | -1.34 | 7.83E-06 | NC   | -     | -        | NC   | -     | -        | DOWN | 28575117                            |
| Tubb1     | tubulin, beta 1 class VI                            | UP   | 1.00  | 1.59E-03 | NC   | -     | -        | NC   | -     | -        | DOWN | 28575117                            |
| Spon2     | spondin 2                                           | UP   | 1.25  | 2.43E-05 | NC   | -     | -        | DOWN | -3.13 | 2.36E-23 | DOWN | 29765063                            |

**Supplementary Table 7 The DEGs validated with published clinical studies**

| Gene ID | Description                      | 1mA vs COPD | log2FC | P value | 3mA vs COPD | log2FC | P value  | COPD vs Normal | log2FC | P value  | Database | PMID              |
|---------|----------------------------------|-------------|--------|---------|-------------|--------|----------|----------------|--------|----------|----------|-------------------|
| Ednrb   | endothelin receptor type B       | NC          | -      | -       | UP          | 1.21   | 3.98E-05 | DOWN           | -1.40  | 2.29E-06 | DOWN     | 28287180;32470642 |
| Cox4i2  | cytochrome c oxidase subunit 4i2 | NC          | -      | -       | UP          | 1.53   | 2.79E-07 | DOWN           | -1.10  | 1.99E-04 | DOWN     | 25834810;32470642 |

|         |                                                                |      |       |          |      |       |          |      |       |          |      |                   |
|---------|----------------------------------------------------------------|------|-------|----------|------|-------|----------|------|-------|----------|------|-------------------|
| Slco4a1 | solute carrier organic anion transporter family, member 4a1    | DOWN | -1.96 | 1.58E-10 | DOWN | -1.51 | 5.66E-07 | UP   | 1.61  | 9.77E-08 | UP   | 25834810          |
| Ldb2    | LIM domain binding 2                                           | NC   | -     | -        | UP   | 1.17  | 7.26E-05 | DOWN | -1.28 | 1.34E-05 | DOWN | 32470642          |
| Slc7a2  | solute carrier family 7 member 2                               | DOWN | -2.11 | 2.61E-12 | DOWN | -1.60 | 6.81E-08 | NC   | -     | -        | UP   | 32470642          |
| Cdh5    | cadherin 5                                                     | NC   | -     | -        | UP   | 1.41  | 1.67E-06 | DOWN | -1.60 | 6.86E-08 | DOWN | 32470642          |
| Fst     | follicle-stimulating hormone receptor 1                        | UP   | 1.24  | 3.21E-05 | UP   | 1.65  | 3.59E-08 | NC   | -     | -        | DOWN | 32470642          |
| Ncf1    | neutrophil cytosolic factor 1                                  | NC   | -     | -        | DOWN | -1.31 | 8.35E-06 | UP   | 1.92  | 1.30E-10 | UP   | 36217144          |
| Phactr2 | phosphatase and actin regulator 2                              | UP   | 1.07  | 2.68E-04 | UP   | 1.06  | 3.08E-04 | DOWN | -1.30 | 9.70E-06 | DOWN | 32470642          |
| Edil3   | EGF like repeats and discoidin domains 3                       | DOWN | -1.13 | 1.13E-04 | DOWN | -1.16 | 7.82E-05 | UP   | 1.52  | 3.37E-07 | UP   | 25834810          |
| Pde5a   | phosphodiesterase 5A                                           | NC   | -     | -        | UP   | 1.35  | 4.60E-06 | DOWN | -1.01 | 5.78E-04 | DOWN | 32470642          |
| Arpp19  | cAMP-regulated phosphoprotein 19                               | NC   | -     | -        | UP   | 1.05  | 9.39E-04 | NC   | -     | -        | DOWN | 28287180          |
| Erg     | ETS transcription factor ERG                                   | UP   | 1.11  | 1.59E-04 | UP   | 1.16  | 8.10E-05 | DOWN | -1.60 | 6.90E-08 | DOWN | 32470642          |
| Slc11a1 | solute carrier family 11 member 1                              | DOWN | -1.25 | 2.20E-05 | DOWN | -1.04 | 3.69E-04 | UP   | 1.96  | 6.02E-11 | UP   | 36217144          |
| Aqp9    | aquaporin 9                                                    | DOWN | -1.14 | 1.71E-04 | DOWN | -1.28 | 2.93E-05 | UP   | 1.67  | 9.71E-08 | UP   | 25834810          |
| Efnb2   | ephrin B2                                                      | NC   | -     | -        | UP   | 1.50  | 3.86E-07 | DOWN | -1.69 | 1.30E-08 | DOWN | 32470642          |
| Cd68    | Cd68 molecule                                                  | DOWN | -1.44 | 1.12E-06 | DOWN | -1.23 | 3.01E-05 | UP   | 2.09  | 4.29E-12 | UP   | 36217144          |
| Cpa3    | carboxypeptidase A3                                            | NC   | -     | -        | DOWN | -1.45 | 1.70E-06 | NC   | -     | -        | UP   | 35983043          |
| Insc    | INSC, spindle orientation adaptor protein                      | NC   | -     | -        | UP   | 1.21  | 6.06E-05 | NC   | -     | -        | DOWN | 32470642          |
| Mrc1    | mannose receptor, C type 1                                     | DOWN | -1.75 | 4.51E-09 | DOWN | -1.32 | 7.39E-06 | UP   | 1.55  | 1.54E-07 | UP   | 25834810          |
| Ptprb   | protein tyrosine phosphatase, receptor type, B                 | NC   | -     | -        | UP   | 1.05  | 3.50E-04 | NC   | -     | -        | DOWN | 32470642          |
| Card14  | caspase recruitment domain family, member 14                   | DOWN | -1.63 | 4.39E-08 | DOWN | -1.07 | 2.56E-04 | UP   | 2.16  | 9.51E-13 | UP   | 32470642          |
| Trem1   | triggering receptor expressed on myeloid cells 1               | DOWN | -1.65 | 2.90E-08 | DOWN | -1.45 | 1.10E-06 | UP   | 1.98  | 5.93E-11 | UP   | 25834810          |
| Samsn1  | SAM domain, SH3 domain and nuclear localization signals, 1     | NC   | -     | -        | DOWN | -1.07 | 2.64E-04 | NC   | -     | -        | UP   | 36217144          |
| Rrad    | Ras related glycolysis inhibitor and calcium channel regulator | UP   | 1.08  | 2.93E-04 | UP   | 1.43  | 1.93E-06 | DOWN | -1.48 | 7.70E-07 | DOWN | 25542208          |
| Gpnmb   | glycoprotein nmb                                               | DOWN | -1.33 | 5.74E-06 | DOWN | -1.18 | 5.50E-05 | UP   | 2.33  | 1.79E-14 | UP   | 36217144          |
| Cav1    | caveolin 1                                                     | NC   | -     | -        | UP   | 1.08  | 2.36E-04 | DOWN | -1.39 | 2.47E-06 | DOWN | 25834810;32470642 |
| Sema6a  | semaphorin 6A                                                  | NC   | -     | -        | UP   | 1.09  | 2.14E-04 | DOWN | -1.34 | 5.59E-06 | DOWN | 32470642          |
| Ms4a1   | membrane spanning 4-domains A1                                 | NC   | -     | -        | DOWN | -1.14 | 1.12E-04 | NC   | -     | -        | UP   | 28287180;25542208 |

|           |                                                                    |      |       |          |      |       |          |      |       |          |      |                            |
|-----------|--------------------------------------------------------------------|------|-------|----------|------|-------|----------|------|-------|----------|------|----------------------------|
| Ak4       | adenylate kinase 4                                                 | NC   | -     | -        | DOWN | -1.02 | 5.61E-04 | UP   | 1.38  | 3.76E-06 | UP   | 32470642                   |
| Itih4     | inter-alpha-trypsin inhibitor heavy chain 4                        | DOWN | -1.56 | 2.34E-07 | DOWN | -1.26 | 2.05E-05 | UP   | 1.38  | 3.55E-06 | UP   | 25542208                   |
| Fcrla     | Fc receptor-like A                                                 | DOWN | -1.48 | 5.71E-07 | DOWN | -1.36 | 4.15E-06 | NC   | -     | -        | UP   | 25542208                   |
| Pcdh17    | protocadherin 17                                                   | NC   | -     | -        | UP   | 1.18  | 6.31E-05 | NC   | -     | -        | DOWN | 32470642                   |
| Trpv3     | transient receptor potential cation channel, subfamily V, member 3 | DOWN | -2.07 | 4.37E-11 | DOWN | -1.04 | 5.27E-04 | NC   | -     | -        | UP   | 32470642                   |
| Armcx6    | armadillo repeat containing, X-linked 6                            | NC   | -     | -        | UP   | 1.45  | 1.77E-06 | DOWN | -1.40 | 3.73E-06 | DOWN | 25834810                   |
| Rasip1    | Ras interacting protein 1                                          | NC   | -     | -        | UP   | 1.05  | 3.14E-04 | DOWN | -1.12 | 1.38E-04 | DOWN | 32470642                   |
| Tnfrsf13c | TNF receptor superfamily member 13C                                | DOWN | -1.02 | 8.29E-04 | DOWN | -1.44 | 2.64E-06 | NC   | -     | -        | UP   | 32470642                   |
| Kdr       | kinase insert domain receptor                                      | NC   | -     | -        | UP   | 1.34  | 5.62E-06 | DOWN | -1.72 | 7.35E-09 | DOWN | 32470642                   |
| Myo10     | myosin X                                                           | NC   | -     | -        | UP   | 1.06  | 3.07E-04 | DOWN | -1.19 | 4.74E-05 | DOWN | 32470642                   |
| Chst2     | carbohydrate sulfotransferase 2                                    | NC   | -     | -        | UP   | 1.12  | 1.41E-04 | DOWN | -1.25 | 2.20E-05 | DOWN | 32470642                   |
| Amotl1    | angiomin-like 1                                                    | NC   | -     | -        | UP   | 1.07  | 2.62E-04 | DOWN | -1.01 | 6.00E-04 | DOWN | 32470642                   |
| Tmem26    | transmembrane protein 26                                           | NC   | -     | -        | UP   | 1.08  | 2.33E-04 | NC   | -     | -        | DOWN | 32470642                   |
| Ncf2      | neutrophil cytosolic factor 2                                      | DOWN | -1.37 | 3.28E-06 | DOWN | -1.10 | 1.87E-04 | UP   | 1.50  | 4.50E-07 | UP   | 36217144                   |
| Myo7a     | myosin VIIA                                                        | DOWN | -1.56 | 1.67E-07 | DOWN | -1.07 | 3.03E-04 | UP   | 2.12  | 4.39E-12 | UP   | 25542208;32470642          |
| Cd300e    | Cd300e molecule                                                    | DOWN | -1.70 | 1.74E-08 | DOWN | -1.70 | 1.73E-08 | UP   | 1.83  | 2.27E-09 | UP   | 25834810                   |
| Pdzd2     | PDZ domain containing 2                                            | NC   | -     | -        | UP   | 1.09  | 1.94E-04 | NC   | -     | -        | DOWN | 32470642                   |
| Fcrlg     | Fc fragment of IgE receptor Ig                                     | DOWN | -1.03 | 4.55E-04 | NC   | -     | -        | UP   | 1.32  | 7.80E-06 | UP   | 35071459;32470642;21940491 |
| Sostdc1   | sclerostin domain containing 1                                     | UP   | 1.72  | 3.08E-08 | NC   | -     | -        | DOWN | -1.41 | 5.11E-06 | DOWN | 21940491                   |
| Egl3      | egl-9 family hypoxia-inducible factor 3                            | DOWN | -1.37 | 4.23E-06 | NC   | -     | -        | UP   | 1.30  | 1.11E-05 | UP   | 32470642                   |
| Parvg     | parvin, gamma                                                      | DOWN | -1.14 | 1.02E-04 | NC   | -     | -        | UP   | 1.50  | 3.74E-07 | UP   | 25542208                   |
| Msr1      | macrophage scavenger receptor 1                                    | DOWN | -1.18 | 6.13E-05 | NC   | -     | -        | UP   | 2.10  | 3.60E-12 | UP   | 36217144                   |
| Alox5     | arachidonate 5-lipoxygenase                                        | DOWN | -1.52 | 2.89E-07 | NC   | -     | -        | NC   | -     | -        | UP   | 36217144                   |



|          |                                                                |      |       |          |    |   |   |      |       |          |      |                            |
|----------|----------------------------------------------------------------|------|-------|----------|----|---|---|------|-------|----------|------|----------------------------|
| Igf1     | insulin-like growth factor 1                                   | DOWN | -1.25 | 2.03E-05 | NC | - | - | UP   | 1.49  | 4.45E-07 | UP   | 25834810                   |
| Alox15   | arachidonate 15-lipoxygenase                                   | DOWN | -1.79 | 3.35E-09 | NC | - | - | NC   | -     | -        | UP   | 32470642                   |
| Hey2     | hes-related family bHLH transcription factor with YRPW motif 2 | UP   | 1.27  | 2.10E-05 | NC | - | - | DOWN | -1.94 | 1.72E-10 | DOWN | 32470642                   |
| Cfb      | complement C2                                                  | DOWN | -1.10 | 1.71E-04 | NC | - | - | UP   | 1.17  | 6.92E-05 | UP   | 32470642                   |
| Lif      | LIF, interleukin 6 family cytokine                             | DOWN | -1.17 | 8.43E-05 | NC | - | - | UP   | 1.33  | 8.14E-06 | UP   | 25834810;32470642          |
| Slc12a8  | solute carrier family 12, member 8                             | DOWN | -1.10 | 2.66E-04 | NC | - | - | NC   | -     | -        | UP   | 32470642                   |
| Cybb     | cytochrome b-245, beta polypeptide                             | DOWN | -1.43 | 1.28E-06 | NC | - | - | UP   | 1.68  | 1.58E-08 | UP   | 23117565;25265030;36217144 |
| Chrm2    | cholinergic receptor, muscarinic 2                             | UP   | 1.10  | 2.91E-04 | NC | - | - | NC   | -     | -        | DOWN | 32470642                   |
| Cgrefl   | cell growth regulator with EF hand domain 1                    | DOWN | -1.42 | 4.22E-06 | NC | - | - | UP   | 1.81  | 7.49E-09 | UP   | 32470642                   |
| Gria1    | glutamate ionotropic receptor AMPA type subunit 1              | UP   | 1.77  | 4.39E-08 | NC | - | - | DOWN | -2.01 | 4.71E-10 | DOWN | 32470642                   |
| Cdc42bpg | CDC42 binding protein kinase gamma                             | UP   | 1.35  | 4.41E-06 | NC | - | - | NC   | -     | -        | DOWN | 32470642                   |
| Snrpn    | SNRPN upstream reading frame                                   | UP   | 1.17  | 7.43E-05 | NC | - | - | NC   | -     | -        | DOWN | 25834810                   |
| C3       | complement C3                                                  | DOWN | -1.01 | 5.63E-04 | NC | - | - | UP   | 2.06  | 7.30E-12 | UP   | 25834810                   |

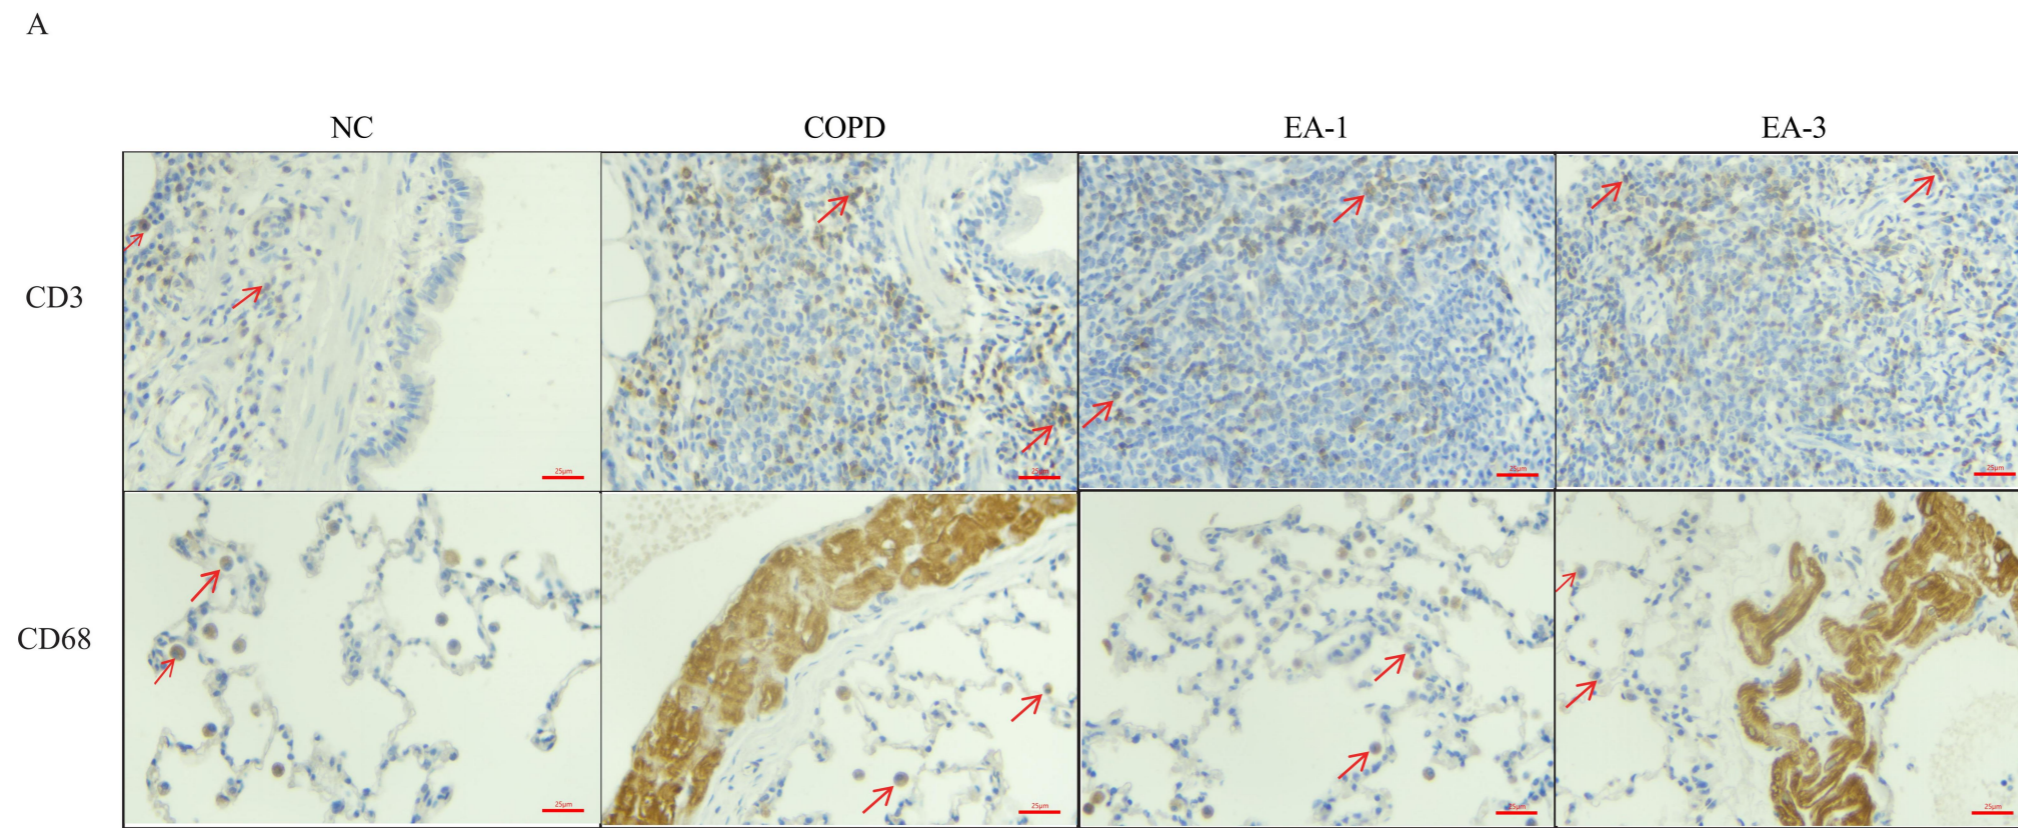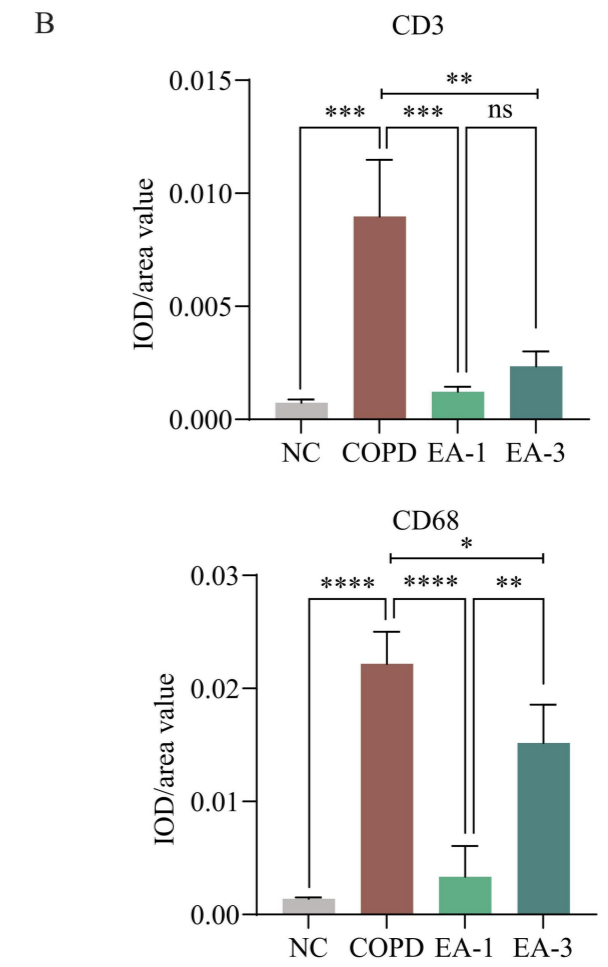

**Supplementary Figure 1 Expression of CD3 (marker of T lymphocytes) and CD68 (marker of macrophages) in lung tissues of each group.** (A) Representative images of IHC stained lung sections from each group (n=3 per group). The cell nucleus appears blue after staining with hematoxylin, while the positive expression revealed by DAB staining appears tan. The red arrows indicate the cells positive for CD3 and CD68. Scale bar: 25µm. (B) IOD/area values in NC, COPD, EA-1, and EA-3 group. \*  $p < 0.05$ , \*\*  $p < 0.01$ , \*\*\*  $p < 0.001$ , \*\*\*\*  $p < 0.0001$ , ns, not significant.

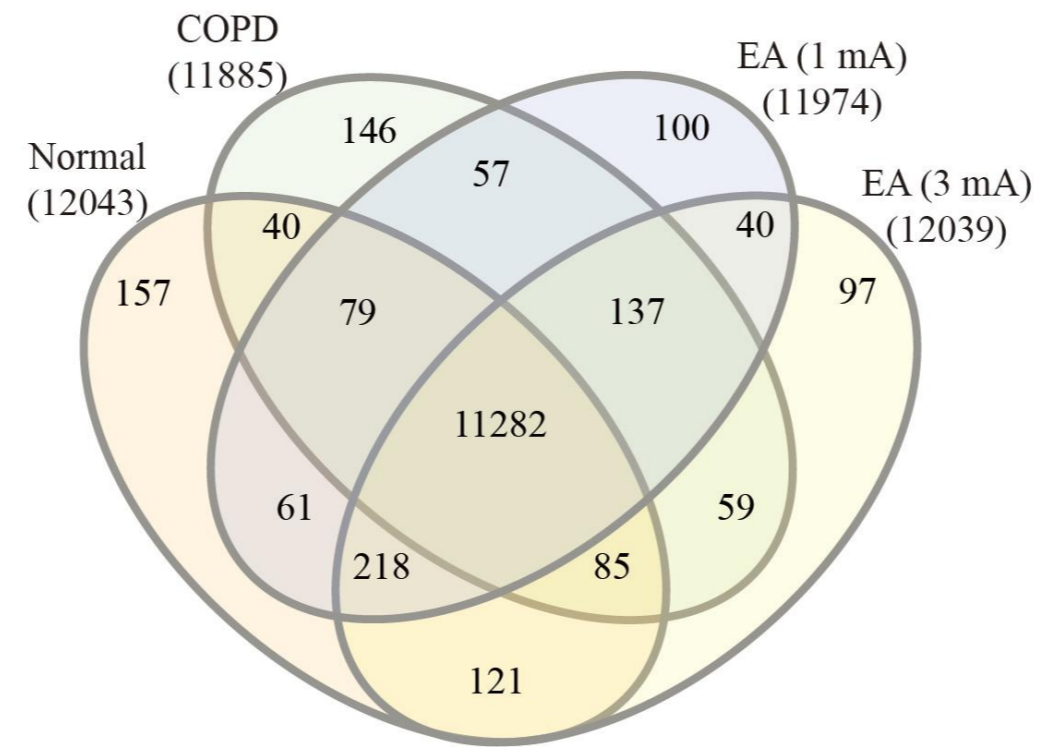

Supplementary Figure 2 Genes distributed in the NC, COPD, EA-1mA and EA-3mA groups
